# Supplementary material for: Statistical response of middle atmosphere composition to solar proton events in WACCM-D simulations: importance of lower ionospheric chemistry
Source: Copernicus journal article supplement (doi:10.5194/acp-2019-1133), 2020-01-17

### HNO<sub>3</sub> Northern hemisphere

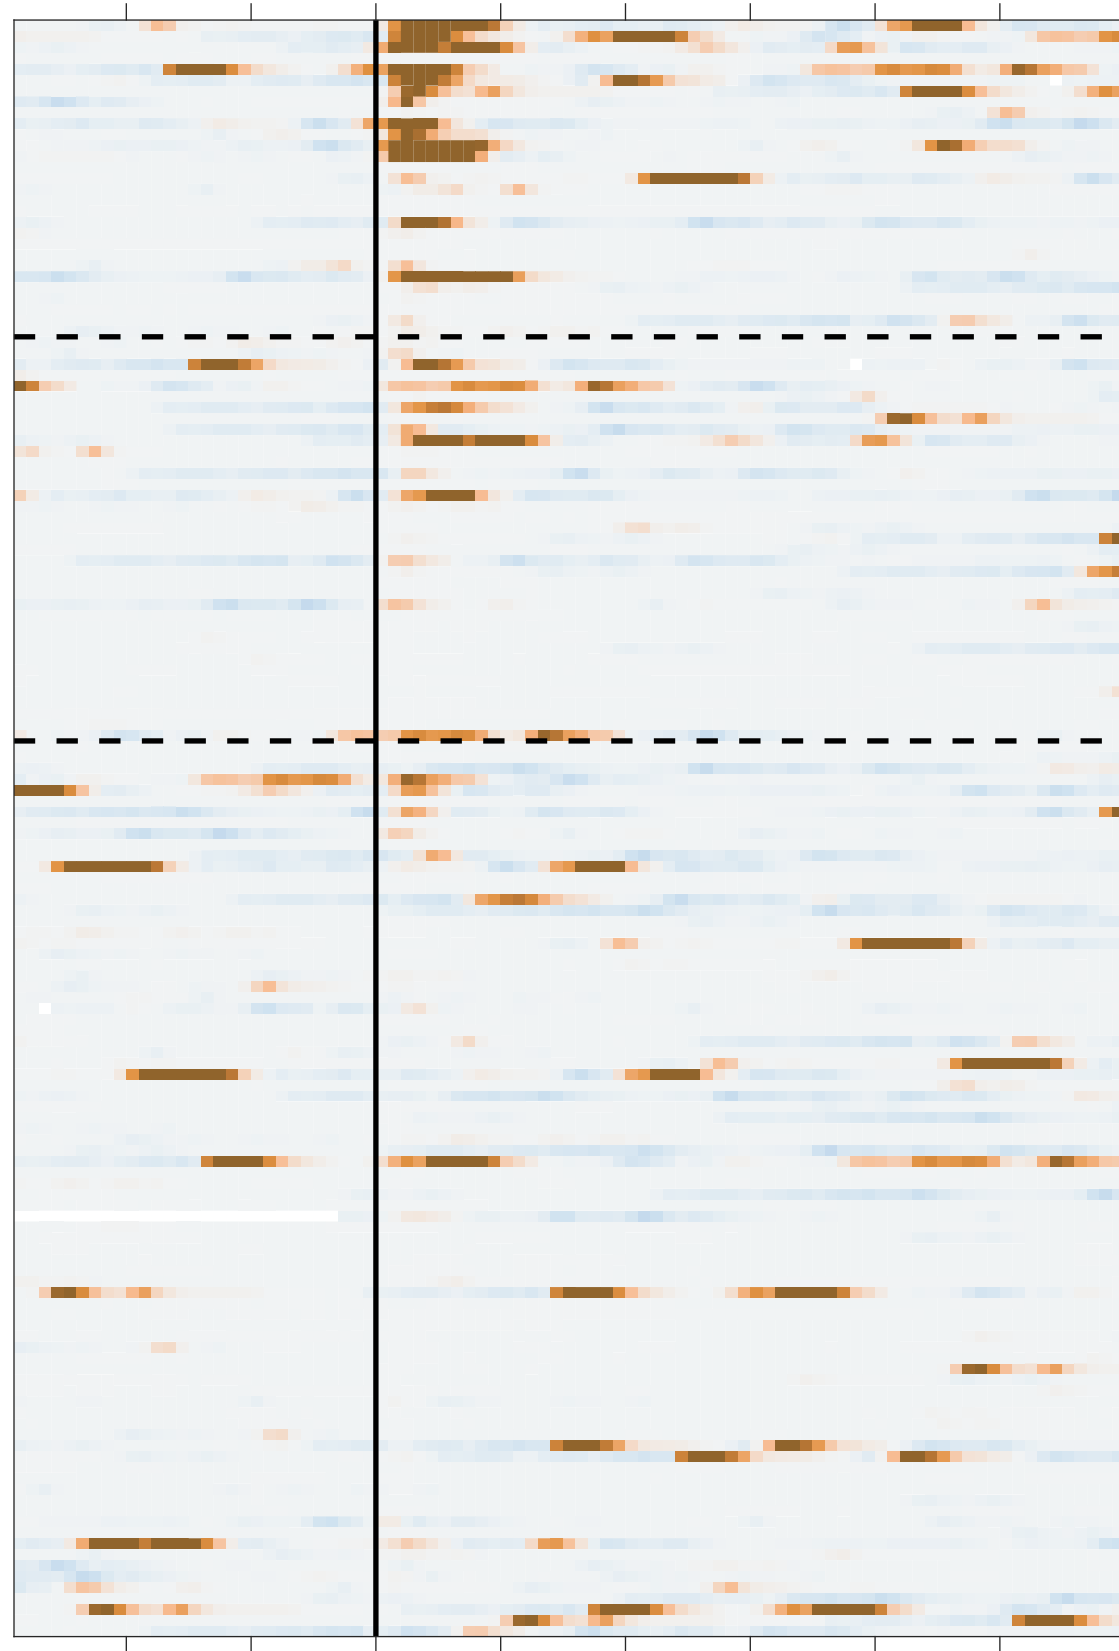

### HNO<sub>3</sub> Southern hemisphere

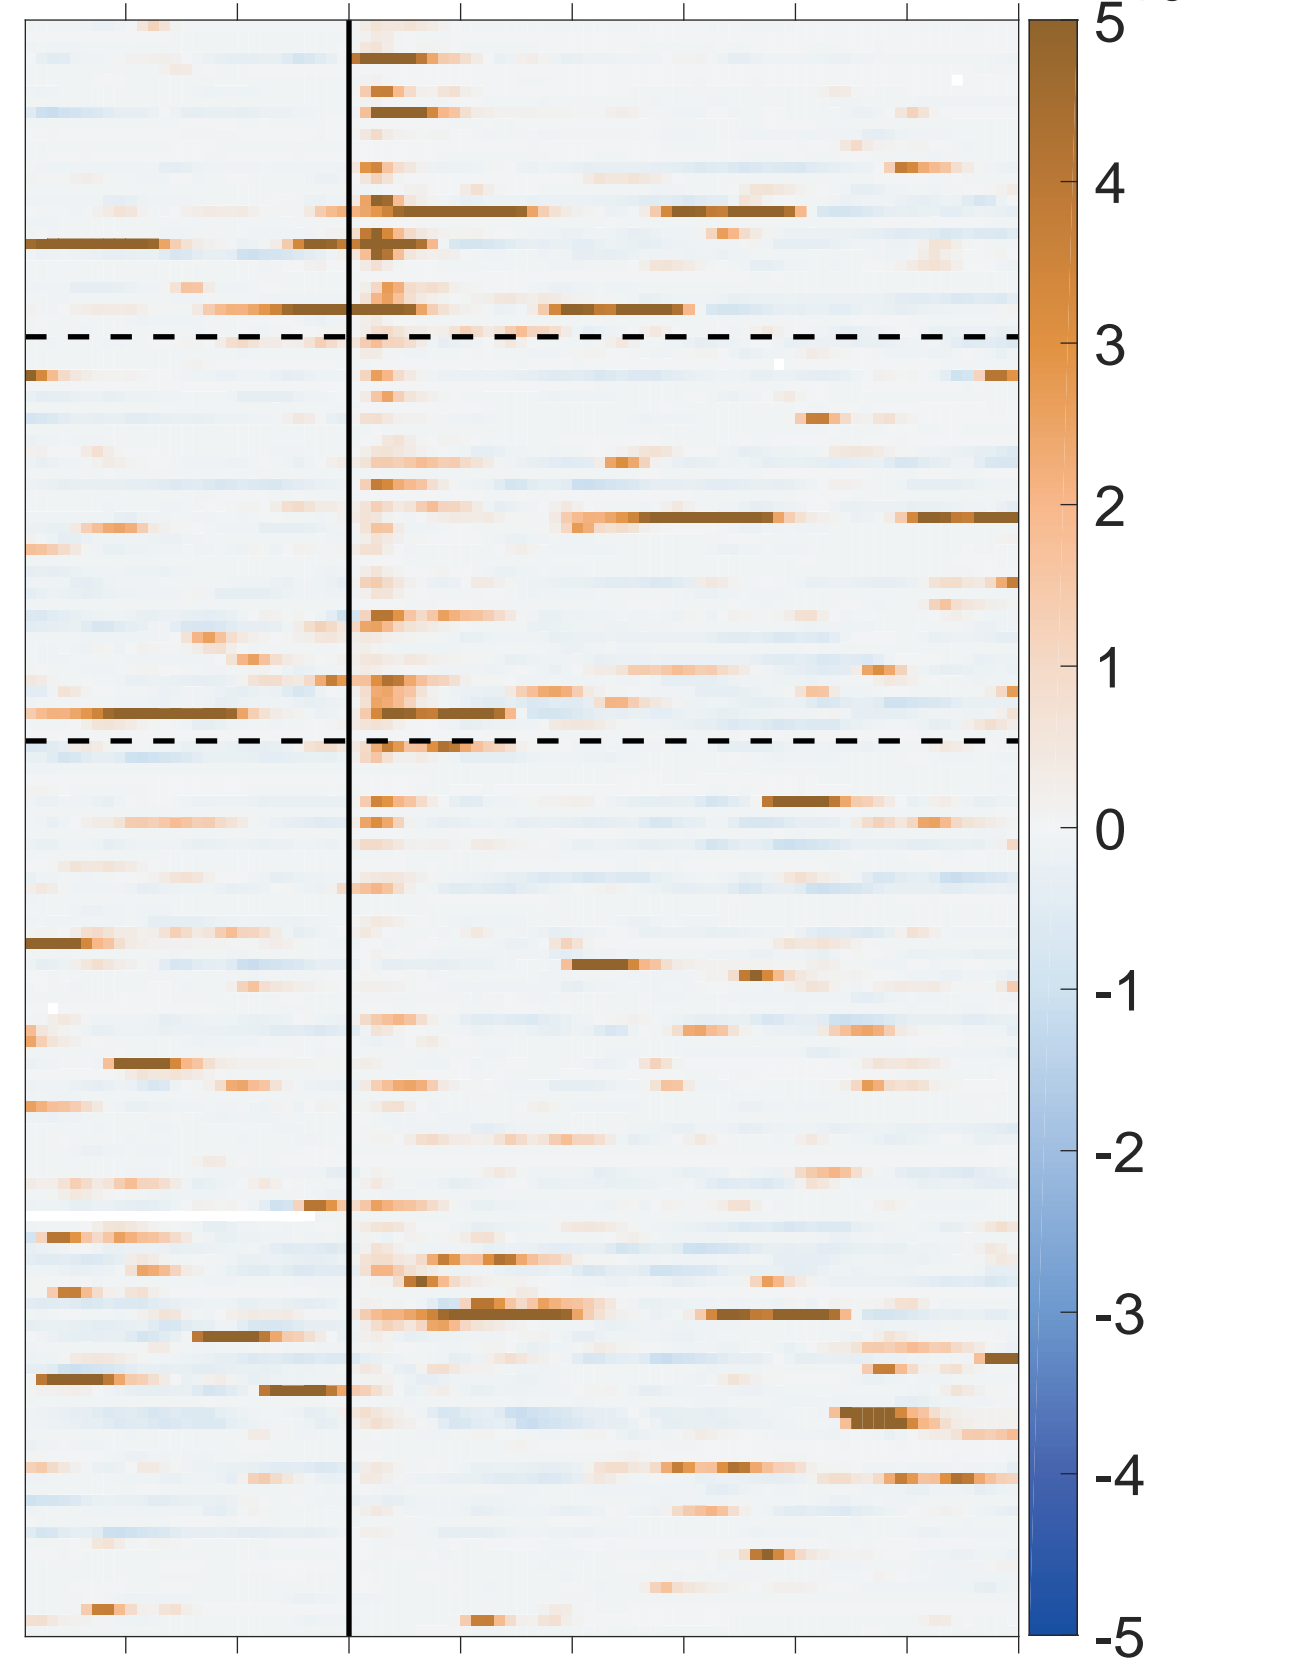

Supplement: Supplementary file [file acp-2019-1133-AC1-supplement.pdf]
